1 **Exploring the factors associated with prelacteal feeding in Papua New**  
2 **Guinea: a population-based cross-sectional study**

3

4 McKenzie Maviso<sup>1</sup>, Elias Namosha<sup>1</sup>, Georgia Guldan<sup>1</sup>

5

6 <sup>1</sup>Division of Public Health, School of Medicine and Health Sciences, University of Papua New

7 Guinea, Port Moresby, Papua New Guinea

8

9

10

11 Correspondence to McKenzie Maviso; [mckenzie.maviso@upng.ac.pg](mailto:mckenzie.maviso@upng.ac.pg)

12

13

14

15

16

17

18

19

20

21

22

23

24

25

26

## 27 **Abstract**

### 28 **Objective**

29 Prelacteal feeds disrupt early breastfeeding initiation and exclusive breastfeeding and increase the  
30 risk of childhood illnesses and under-five mortality. Despite its negative health outcomes, prelacteal  
31 feeding prevails in Papua New Guinea (PNG). This study aimed to investigate the factors associated  
32 with prelacteal feeding among women in PNG.

### 33 **Design and setting**

34 A population-based cross-sectional study based on Demographic and Health Survey data

### 35 **Setting**

36 Papua New Guinea

### 37 **Participants**

38 A total weighted sample of 4399 women was included in the study.

### 39 **Main outcome measures**

40 Prelacteal feeding, modeled using multivariable logistic regression.

### 41 **Results**

42 About 10% (95% CI: 9 to 11) of women provided prelacteal feeds to their infants in PNG. The most  
43 frequently reported prelacteal feed was plain water (71.7%), followed by grains (eg, noodles)  
44 (47.1%), dark green leafy vegetables (42.1%), and soup (39.7%). Women with no formal (AOR 1.4,  
45 95% CI: 1.0 to 3.0) or primary education (AOR 1.5, 95% CI: 1.0 to 2.9), from the Islands region  
46 (AOR 2.3, 95% CI: 1.5 to 3.5), who had a cesarean section (AOR 4.1, 95% CI: 2.4 to 7.2), and who  
47 had given birth at home or in the village (AOR 3.7, 95% CI: 2.1 to 6.8) had higher odds of  
48 providing prelacteal feeds. No statistically significant association was found between immediate  
49 newborn skin-to-skin contact after birth and prelacteal feeding.

### 50 **Conclusion**

51 Our study underscores the role of sociodemographic and healthcare system factors in prelacteal  
52 feeding. Strengthening healthcare providers' capacity to increase mothers' awareness of optimal

53 breastfeeding and promote more health facility births is warranted. Comprehensive breastfeeding  
54 education should also be promoted at antenatal clinics and during outreach healthcare activities.

55

## 56 **Strengths and limitations of the study**

- 57 • The rigor of the methodological approach and representativeness of the survey render its results  
58 and recommendations generalisable to the country.
- 59 • The study's findings, based on appropriate estimation adjustments and sample design, are  
60 representative of female population in PNG; thus could guide policy development and design  
61 for effective infant and child feeding interventions.
- 62 • The study's cross-sectional nature means that a temporal relationship cannot be established  
63 between the outcome and independent variables.
- 64 • Prolactal feeding was assessed based on the maternal self-report, which might have resulted in  
65 desirability bias; mothers may be less likely to report that they have provided prolactal feeds  
66 while knowing its adverse outcomes.
- 67 • The DHS did not collect some important information, such as maternal beliefs, misconceptions,  
68 knowledge, attitudes, and practices towards breastfeeding, which could impact prolactal  
69 feeding in this context.

70

## 71 **Introduction**

72 Breastfeeding and human milk are the normative standards for infant feeding and nutrition, offering  
73 numerous short- and long-term health benefits for both mother and child [1]. Improving  
74 breastfeeding rates could potentially save over 800 000 children under five globally every year [2].  
75 Breastfeeding has been proven to decrease childhood diseases such as respiratory tract infections,  
76 otitis media, diarrheal diseases, undernutrition, and childhood obesity [2–5]. Also, breastfeeding has  
77 the potential to prevent approximately 20 000 deaths from various diseases such as breast cancer,  
78 diabetes, obesity, and cardiovascular diseases [2,4]. Thus, early initiation of breastfeeding within

79 the first hour after birth, exclusively until six months, and continuing up to two years of age is  
80 highly recommended [6].

81  
82 Despite the multiple benefits of breastfeeding, not all infants worldwide receive early, exclusive, or  
83 continued breastfeeding. Only 37% of infants under five are exclusively breastfed in low- and  
84 middle-income countries (LMICs) [2,7], while inappropriate feeding practices account for two-  
85 thirds of malnutrition-related deaths during the first 24 months of life [8]. Delays in breastfeeding  
86 initiation within the first hour of birth can disrupt exclusive breastfeeding and increase the odds of  
87 prelacteal feeding, including neonatal mortality [9,10].

88  
89 Prelacteal feeding, which is the provision of any food or liquid to an infant before breastfeeding is  
90 established during the first three days [11], has been shown to interrupt breastfeeding initiation and  
91 impede exclusive breastfeeding [12–14]. It can also be detrimental to breastfeeding and harmful to  
92 health, as it deprives infants of valuable nutrients and antibody-rich colostrum and exposes them to  
93 the risk of infection [15–18]. Studies have shown that the type of prelacteal feed given to the  
94 newborn is predominantly associated with sociodemographic and economic factors (eg, education,  
95 occupation, income), maternal health care service utilization, mode of birth, place of giving birth,  
96 breastfeeding education, and unskilled birth attendants [16,19–21]. Other factors such as poor  
97 breastfeeding knowledge, breastfeeding problems, maternal illness, delayed initiation of  
98 breastfeeding, and social and cultural norms are factors associated with prelacteal feeding [22–25].

99  
100 Additionally, prelacteal feeding predisposes infants to pathogenic factors, creating physiological  
101 disruptions in the immature gastrointestinal systems, leading to infantile diarrhoea, and affecting  
102 infants' development [18,26]. However, despite its consequences, it remains a prevailing nutritional  
103 malpractice and a risk indicator for infant morbidity and mortality in LMICs [27]. A population-  
104 based analysis of 57 participating countries found that prelacteal feeding remained prevalent in  
105 LMICs, with Asia having the highest prevalence (nearly 60%) compared to other regions (<40%)  
106 [28]. Similarly, recent studies in the Asia-Pacific, such as Bangladesh, Nepal, and Pakistan, showed

107 high prelacteal feeding rates (29%, 30.2%, and 32%, respectively) [29–31]. Such forms of  
108 supplementation can be particularly deleterious in settings where poverty or resource scarcity can  
109 impede nutritional potential.

110  
111 PNG, a linguistically diverse country, has a strong breastfeeding culture, with an estimated  
112 breastfeeding rate ranging from 62% to 85% among children aged less than 24 months [32,33].  
113 Prior studies further indicated a high prevalence of early initiation of breastfeeding in the remote  
114 settings of Madang (36%) and Gulf (69%) provinces [34,35]. Despite this evidence, a recent DHS  
115 finding revealed that 40% of women in PNG delayed breastfeeding initiation within the first hour  
116 after birth [36]. Similarly, only about 50% of children aged 6 to 8 months from urban and rural  
117 locations in six provinces were fed complementary foods in the country [33]. Suboptimal  
118 breastfeeding practices have been associated with maternal age, lack of breastfeeding knowledge  
119 and support, poor antenatal education, place and type of birth, poor skin-to-skin contact, and  
120 sociocultural norms [25,34,36–38].

121  
122 There is therefore evidence that suboptimal breastfeeding and the introduction of prelacteal feeds  
123 are common in PNG [25,34,37,38]. However, little is known about factors that may influence  
124 prelacteal feeding at the population level. There is also insufficient evidence to determine whether  
125 PNG women are aware of the risks associated with prelacteal feeding, such as gastroenteritis and  
126 respiratory infections. To bridge the knowledge gap and create successful breastfeeding-targeted  
127 interventions, further research is required. Hence, this study aimed to assess factors associated with  
128 prelacteal feeding in PNG. The study's results could offer valuable insights for developing  
129 innovative strategies to enhance infant and young child feeding and health in the country.

130

## 131 **Methods**

### 132 **Data source and sampling**

133 This study used a child dataset from the PNGDHS, a cross-sectional, two-stage cluster sampling  
134 study representing the entire country from October 2016 to December 2018. The survey used the  
135 census units (CU) list from the 2011 PNG National Population and Housing Census as the sampling  
136 frame. Stratification of the sample was achieved by two categories: urban and rural areas, resulting  
137 in 43 sampling strata, except for the National Capital District, which had no rural areas. Samples of  
138 CUs were selected independently in each stratum in two stages. The first stage involved the  
139 selection of 800 CUs, which was done through probability proportional to CU size. The second  
140 stage involves the selection of 24 households from each cluster through probability random  
141 sampling, resulting in a total sample size of approximately 19200 households. The selected sample  
142 consisted of 17505 households. Of the 18175 women identified in the interview households, 15198  
143 completed the interviews (84% response rate). The survey used three sets of validated  
144 questionnaires to collect data: a household questionnaire, a woman's questionnaire, and a man's  
145 questionnaire. The dataset used in this study included all the relevant information on child health  
146 from all three questionnaires. Furthermore, the study population for this study was restricted to  
147 mothers who had given birth in the last three years to enable comparability with the existing  
148 literature and minimize recall bias [39]. Women who had never been pregnant were excluded from  
149 the analysis. A total weighted sample of 4399 women with complete information about the  
150 variables of interest was included in the final analysis. Details of methodology, sampling design,  
151 pretesting, training of field workers, and household selection are in the final report [32].

### 152 153 **Study variables**

154 The outcome variable for this study was prelacteal feeding. Women were asked during the survey:  
155 "In the first three days after birth, was (child's name) given anything to drink or eat other than  
156 breast milk?" Their responses were coded as "1" for "yes" if the child was given anything other

157 than breast milk or “0” for “no” if prelacteal feeds were not given. Prelacteal feeding is described as  
158 any food or liquid given before the onset of lactogenesis II, that is, the onset of copious breast milk  
159 secretion occurring within four days of birth [40]. Infant feeding included plain water as the most  
160 commonly reported, juices, powdered milk (non-breast milk), infant formula, fruits (papaya and  
161 mango), meat products (eggs, chicken, lamb, and fish), vegetables and tubers (potatoes and  
162 cassava), and others [32].

163  
164 The independent variables were sociodemographic characteristics, which included maternal age,  
165 marital status, education status, occupation, wealth index, region, and place of residence, and  
166 frequency of mass media access, which included reading a newspaper or magazine, listening to the  
167 radio, and watching television. Maternal health service use variables included the number of  
168 antenatal visits in pregnancy, mode of birth, and place of birth. Child-related factors comprised the  
169 child’s birth order, perceived birth size, birth weight, initiation of breastfeeding, and newborn skin-  
170 to-skin contact immediately after birth.

171

## 172 **Statistical analysis**

173 Analyses were limited to participants with complete data for the variables of interest using IBM  
174 SPSS for Windows, Version 26.0 (IBM Corp., Armonk, NY, USA). The sample was weighted  
175 using the primary sampling unit variable, stratification variable, and weight variable to restore its  
176 representativeness and get a better estimate throughout the analysis. Descriptive statistics were used  
177 to analyze the sociodemographic characteristics of participants, while inferential statistics were  
178 employed for generalization to the entire population through bivariate and multivariate analysis. All  
179 the variables, whether significant in the chi-square test or not were included in a multivariable  
180 analysis to determine their collective associations with HIV testing. All the analyses were  
181 performed using the Complex Sample Analysis procedure which was deemed necessary to adjust  
182 for sample weight, and multi-stage

183 sampling [41]. Adjusted odds ratios (AORs) with 95% confidence intervals (CIs) were reported. A  
184  $p \leq 0.05$  was considered statistically significant.

185

## 186 Patient and public involvement

187 Patients and the public were not involved in the study.

## 188 Results

### 189 Characteristics of the participants

190 **Table 1** presents the characteristics of the participants. A total of 4399 women were included in the  
191 study. The mean maternal age of the respondents was 28.9 years (SD = 6.9). About half (50.4%)  
192 had completed primary education, and most were not working (69.8%). In terms of mass media  
193 exposure, over two-thirds of women never read a newspaper or magazine (67.2%), listened to the  
194 radio (69.7%), or watched television (80.2%).

195

**Table 1. Characteristics of the participants, PNG, 2016–2018 (N = 4399)**

| Characteristics                        | Frequency (n) | Weighted (%) |
|----------------------------------------|---------------|--------------|
| Age group (years)                      |               |              |
| 15–24                                  | 1323          | (30.1)       |
| 25–34                                  | 2071          | (47.1)       |
| 35–44                                  | 910           | (20.7)       |
| 45–49                                  | 94            | (2.1)        |
| Mean age (SD) <sup>†</sup> 28.9 (6.89) |               |              |
| Marital status                         |               |              |
| Never married                          | 159           | (3.6)        |
| Married                                | 3984          | (90.6)       |
| Separated/divorced                     | 257           | (5.8)        |
| Educational level                      |               |              |
| No formal education                    | 1140          | (25.9)       |
| Primary                                | 2218          | (50.4)       |
| Secondary                              | 911           | (20.7)       |
| College/tertiary                       | 130           | (3.0)        |
| Occupation                             |               |              |
| Not working                            | 3071          | (69.8)       |



|                                                                |      |        |
|----------------------------------------------------------------|------|--------|
| Working                                                        | 1328 | (30.2) |
| Wealth index                                                   |      |        |
| Poorest                                                        | 961  | (21.9) |
| Poorer                                                         | 900  | (20.5) |
| Middle                                                         | 911  | (20.7) |
| Richer                                                         | 881  | (20.0) |
| Richest                                                        | 745  | (16.9) |
| Frequency of reading a newspaper/magazine<br>(missing, n = 32) |      |        |
| Not at all                                                     | 2934 | (67.2) |
| Less than once a week                                          | 772  | (17.7) |
| Once a week                                                    | 661  | (15.1) |
| Frequency of listening to the radio (missing, n = 32)          |      |        |
| Not at all                                                     | 3043 | (69.7) |
| Less than once a week                                          | 769  | (17.6) |
| Once a week                                                    | 555  | (12.7) |
| Frequency of watching television (missing, n = 26)             |      |        |
| Not at all                                                     | 3505 | (80.2) |
| Less than once a week                                          | 393  | (9.0)  |
| Once a week                                                    | 476  | (10.9) |
| Place of Residence                                             |      |        |
| Urban                                                          | 497  | (11.3) |
| Rural                                                          | 3902 | (88.7) |
| Region                                                         |      |        |
| Southern                                                       | 900  | (20.5) |
| Highlands                                                      | 1655 | (37.6) |
| Momase                                                         | 1192 | (27.1) |
| Islands                                                        | 653  | (14.8) |

<sup>†</sup>SD = Standard deviation

196

## 197 **Maternal and child-related factors**

198 **Table 2** presents maternal and child-related factors. The majority of women had at least one  
 199 antenatal visit during their pregnancies (72.8%) and gave birth in a public health facility (59.6%).  
 200 Regarding child-related factors, over one-third of the infants (38.1%) had a birth order of four or  
 201 more. Most weighed  $\geq 2500$  g at birth (82.7%) and also half (46.2%) were introduced immediately

202 to newborn skin-to-skin contact after birth with their mothers. About a quarter (25.1%) delayed  
 203 initiation of breastfeeding for more than an hour of birth.  
 204

**Table 2. Maternal and child-related factors, PNG, 2016–2018 (N = 4399)**

| Characteristics                                 | Frequency (n) | Weighted (%) |
|-------------------------------------------------|---------------|--------------|
| Antenatal visits (at least 1) (missing, n = 55) |               |              |
| No                                              | 1182          | (27.2)       |
| Yes                                             | 3163          | (72.8)       |
| Mode of birth                                   |               |              |
| Vaginal                                         | 4276          | (97.2)       |
| Cesarean section                                | 124           | (2.8)        |
| Place of birth                                  |               |              |
| Home/village                                    | 1779          | (40.4)       |
| Public health facility                          | 2621          | (59.6)       |
| Birth order                                     |               |              |
| 1 <sup>st</sup>                                 | 1,020         | (23.2)       |
| 2 <sup>nd</sup>                                 | 901           | (20.5)       |
| 3 <sup>rd</sup>                                 | 801           | (18.2)       |
| 4 <sup>th</sup> or more                         | 1677          | (38.1)       |
| Birth size (missing, n = 148)                   |               |              |
| Large                                           | 1578          | (37.1)       |
| Average                                         | 1800          | (42.3)       |
| Small                                           | 873           | (20.5)       |
| Birth weight (g) (missing, n = 2,145)           |               |              |
| ≤ 2,500                                         | 390           | (17.3)       |
| ≥ 2,500                                         | 1864          | (82.7)       |
| Newborn skin-to-skin contact (missing, n = 62)  |               |              |
| No                                              | 2332          | (53.8)       |
| Yes                                             | 2005          | (46.2)       |
| Initiation of breastfeeding (missing, n = 968)  |               |              |
| Early (<1 hr.)                                  | 2570          | (74.9)       |
| Delayed (>1 hr.)                                | 861           | (25.1)       |

205  
 206  
 207

208 **Prevalence of prelacteal feeding**

209 **Table 3** shows the proportion of the type of prelacteal feeds given to newborn infants in PNG. A  
 210 total of 433 [9.6% (95% CI: 9 to 11)] weighted proportion] women introduced prelacteal feeds to  
 211 their infants other than breastfeeding in the first three days after the birth. The most frequently  
 212 reported prelacteal feed was plain water (71.7%), followed by grains (eg, noodles) (47.1%), dark  
 213 green leafy vegetables (42.1%) and soup (39.7%).

214

**Table 3. Types of prelacteal feeds given to newborn infants, PNGDHS 2016–2018**

| Prelacteal feeds                                         | Frequency (n = 1988) |        |      |        |
|----------------------------------------------------------|----------------------|--------|------|--------|
|                                                          | No                   | (%)    | Yes  | (%)    |
| Baby formula                                             | 1902                 | (95.7) | 86   | (4.3)  |
| Beans, peas, lentils, nuts                               | 1629                 | (81.9) | 359  | (18.1) |
| Dairy products (eg, cheese, yogurt, other milk products) | 1870                 | (94.1) | 118  | (5.9)  |
| Dark green leafy vegetables                              | 1152                 | (57.9) | 836  | (42.1) |
| Eggs                                                     | 1583                 | (79.6) | 405  | (20.4) |
| Fruits (eg, mangoes, papayas, other vitamin A fruits)    | 1361                 | (68.5) | 627  | (31.5) |
| Gave child juice                                         | 1436                 | (72.2) | 552  | (27.8) |
| Grains (eg, bread, noodles)                              | 1051                 | (52.9) | 937  | (47.1) |
| Liver, heart, other organs                               | 1881                 | (94.6) | 107  | (5.4)  |
| Meat (beef, pork, lamb, chicken, fish)                   | 1699                 | (85.5) | 289  | (14.5) |
| Other liquid                                             | 1466                 | (73.7) | 522  | (26.3) |
| Other solid-semisolid food                               | 1405                 | (70.7) | 583  | (29.3) |
| Plain water                                              | 563                  | (28.3) | 1425 | (71.7) |
| Soup/clear broth                                         | 1199                 | (60.3) | 789  | (39.7) |
| Tinned, powdered or fresh milk                           | 1815                 | (91.3) | 173  | (8.7)  |
| Tubers (eg, potatoes, cassava)                           | 1257                 | (63.2) | 731  | (36.8) |
| Vegetables (eg, pumpkin, carrots, squash)                | 884                  | (44.5) | 1104 | (55.5) |

215

## 216 **Factors associated with prelacteal feeding in PNG**

217 **Table 4** shows factors associated with prelacteal feeding in PNG. In the bivariate analysis,  
218 educational level, occupation, wealth index, frequency of mass media access (eg, newspaper, radio,  
219 and television), region, place of residence, mode of birth, place of birth, and birth weight were all  
220 statistically significantly associated with prelacteal feeding. Women with no formal (AOR 1.4; 95%  
221 CI: 1.0 to 3.0) or primary education (AOR 1.5, 95% CI: 1.0 to 2.9), from the Islands region (AOR  
222 2.3, 95% CI: 1.5 to 3.5), had a cesarean section (AOR 4.1, 95% CI: 2.4 to 7.2), and who had given  
223 birth at home or in the village (AOR 3.8, 95% CI: 2.1 to 6.8) had higher odds of providing  
224 prelacteal feeds. However, secondary education (AOR = 0.9, 95% CI: 0.5 to 1.8), the Highlands  
225 (AOR 0.9, 95% CI: 0.6 to 1.4) and the Momase region (AOR 0.6, 95% CI: 0.4 to 1.1) were  
226 protective factors of prelacteal feeding. No statistically significant association was found between  
227 immediate newborn skin-to-skin contact after birth and prelacteal feeding ( $p = 0.772$ ).

228

## 229 **Discussion**

230 In this study, we assessed the prevalence and factors associated with prelacteal feeding in PNG  
231 using nationally representative survey data. Overall, one in ten (10%) women had ever introduced  
232 prelacteal feeds to their newborn infants. Our finding is similar to the proportion found in studies  
233 conducted in East Africa (12%) [21] and Ethiopia (14%) [16,42], but much lower than findings  
234 found in studies conducted in other Asian LMICs (33.9%) [17], including Bangladesh (29%) [31],  
235 Nepal (30.6%) [29], and Indonesia (45%) [43]. Reasons for the differences in the rates of prelacteal  
236 feeding may be due to sociocultural factors, geographical settings, maternal health service use or  
237 availability, and access to media and information across different countries.

238

**Table 4. Multivariate analysis of factors associated with prelacteal feeding in PNG, 2016–2018 (N = 4399)**

| Characteristics     | Prelacteal feeds |                  | COR (95% CI)     | AOR (95% CI)     | P value*     |
|---------------------|------------------|------------------|------------------|------------------|--------------|
|                     | No, n = 3967 (%) | Yes, n = 433 (%) |                  |                  |              |
| Age group (years)   |                  |                  |                  |                  | 0.628        |
| 15–24               | 1215 (30.6)      | 108 (24.9)       | Ref.             | Ref.             |              |
| 25–34               | 1858 (46.8)      | 213 (49.2)       | 1.3 (0.9 to 1.8) | 1.3 (0.8 to 1.9) |              |
| 35–44               | 806 (20.3)       | 104 (24.1)       | 1.5 (1.0 to 2.0) | 1.3 (0.8 to 2.2) |              |
| 45–49               | 87 (2.2)         | 8 (1.8)          | 1.0 (0.4 to 2.5) | 0.9 (0.4 to 2.8) |              |
| Marital status      |                  |                  |                  |                  | 0.595        |
| Never married       | 141 (3.6)        | 18 (4.2)         | 1.4 (0.7 to 2.8) | 1.5 (0.7 to 3.1) |              |
| Married             | 3591 (90.5)      | 393 (90.8)       | 1.2 (0.7 to 1.9) | 1.3 (0.8 to 2.1) |              |
| Separated/divorced  | 235 (5.9)        | 22 (5.0)         | Ref.             | Ref.             |              |
| Educational level   |                  |                  |                  |                  | <b>0.031</b> |
| No formal education | 1058 (26.7)      | 82 (19.0)        | 0.6 (0.3 to 1.1) | 1.4 (1.0 to 3.0) |              |
| Primary             | 1976 (49.8)      | 242 (56.0)       | 0.9 (0.5 to 1.7) | 1.5 (1.0 to 2.9) |              |
| Secondary           | 819 (20.6)       | 92 (21.3)        | 0.8 (0.4 to 1.6) | 0.9 (0.5 to 1.8) |              |
| College/tertiary    | 114 (2.9)        | 16 (3.7)         | Ref.             | Ref.             |              |
| Occupation          |                  |                  |                  |                  | 0.382        |
| Not working         | 2794 (70.4)      | 277 (64.1)       | 0.8 (0.6 to 1.0) | 0.9 (0.6 to 1.2) |              |
| Working             | 1173 (29.6)      | 155 (35.9)       | Ref.             | Ref.             |              |
| Wealth index        |                  |                  |                  |                  | 0.855        |

|                                                                |             |            |                  |                  |                  |
|----------------------------------------------------------------|-------------|------------|------------------|------------------|------------------|
| Poorest                                                        | 888 (22.4)  | 73 (16.9)  | 0.6 (0.4 to 0.9) | 1.4 (0.6 to 3.1) |                  |
| Poorer                                                         | 821 (20.7)  | 79 (18.2)  | 0.8 (0.5 to 1.1) | 1.5 (0.7 to 3.2) |                  |
| Middle                                                         | 830 (20.9)  | 82 (18.9)  | 0.8 (0.5 to 1.2) | 1.4 (0.7 to 2.8) |                  |
| Richer                                                         | 768 (19.4)  | 114 (26.3) | 1.2 (0.8 to 1.7) | 1.4 (0.7 to 2.6) |                  |
| Richest                                                        | 660 (16.6)  | 85 (19.6)  | Ref.             | Ref.             |                  |
| Frequency of reading a newspaper/magazine<br>(missing, n = 34) |             |            |                  |                  | 0.358            |
| Not at all                                                     | 2789 (70.9) | 255 (59.0) | Ref.             | Ref.             |                  |
| Less than once a week                                          | 670 (17.0)  | 99 (22.9)  | 1.6 (1.2 to 2.2) | 1.4 (0.9 to 2.1) |                  |
| Once a week                                                    | 477 (12.1)  | 78 (18.1)  | 1.8 (1.3 to 2.6) | 1.2 (0.7 to 2.0) |                  |
| Frequency of listening to the radio (missing, n = 49)          |             |            |                  |                  | 0.212            |
| Not at all                                                     | 2693 (68.5) | 242 (56.0) | Ref.             | Ref.             |                  |
| Less than once a week                                          | 674 (17.1)  | 97 (22.5)  | 1.6 (1.2 to 2.3) | 1.2 (0.8 to 1.9) |                  |
| Once a week                                                    | 567 (14.4)  | 93 (21.5)  | 1.8 (1.3 to 2.7) | 1.5 (0.9 to 2.4) |                  |
| Frequency of watching television (missing, n = 47)             |             |            |                  |                  | 0.444            |
| Not at all                                                     | 3189 (80.9) | 317 (73.2) | Ref.             | Ref.             |                  |
| Less than once a week                                          | 344 (8.7)   | 49 (11.3)  | 1.4 (0.9 to 2.2) | 1.2 (0.7 to 1.9) |                  |
| Once a week                                                    | 409 (10.4)  | 67 (15.5)  | 1.6 (1.2 to 2.3) | 1.4 (0.8 to 2.4) |                  |
| Region                                                         |             |            |                  |                  | <b>&lt;0.001</b> |
| Southern                                                       | 810 (20.4)  | 91 (21.0)  | Ref.             | Ref.             |                  |
| Highlands                                                      | 1519 (38.3) | 135 (31.1) | 0.8 (0.6 to 1.1) | 0.9 (0.6 to 1.4) |                  |
| Momase                                                         | 1103 (27.8) | 89 (20.6)  | 0.7 (0.4 to 1.2) | 0.6 (0.4 to 1.1) |                  |

|                                                                          |             |            |                  |                   |                  |
|--------------------------------------------------------------------------|-------------|------------|------------------|-------------------|------------------|
| Islands                                                                  | 535 (13.5)  | 118 (27.3) | 1.9 (1.3 to 2.9) | 2.3 (1.5 to 3.5)  |                  |
| Place of Residence                                                       |             |            |                  |                   | 0.081            |
| Urban                                                                    | 423 (10.7)  | 74 (17.1)  | Ref.             | Ref.              |                  |
| Rural                                                                    | 3541 (89.3) | 358 (82.9) | 0.6 (0.3 to 0.9) | 0.5 (0.2 to 1.1)  |                  |
| Antenatal visits during pregnancy (at least 1 or more) (missing, n = 69) |             |            |                  |                   | 0.278            |
| No                                                                       | 1083 (27.6) | 99 (23.5)  | 0.8 (0.6 to 1.1) | 0.8 (0.5 to 1.2)  |                  |
| Yes                                                                      | 2840 (72.4) | 323 (76.5) | Ref.             | Ref.              |                  |
| Mode of birth                                                            |             |            |                  |                   | <b>&lt;0.001</b> |
| Vaginal                                                                  | 3875 (97.7) | 401 (92.6) | Ref.             | Ref.              |                  |
| Cesarean section                                                         | 92 (2.3)    | 32 (7.4)   | 3.4 (1.9 to 5.7) | 4.1 (2.4 to 7.2)  |                  |
| Place of birth                                                           |             |            |                  |                   | <b>0.001</b>     |
| Home/village                                                             | 1588 (40.0) | 190 (44.0) | 1.2 (0.9 to 1.5) | 3.7 (2.1 to 6.8)  |                  |
| Health facility                                                          | 2378 (60.0) | 242 (56.0) | Ref.             | Ref.              |                  |
| Birth order                                                              |             |            |                  |                   | 0.219            |
| 1 <sup>st</sup>                                                          | 918 (23.1)  | 102 (23.6) | Ref.             | Ref.              |                  |
| 2 <sup>nd</sup>                                                          | 833 (21.0)  | 68 (15.7)  | 0.7 (0.5 to 1.1) | 0.63 (0.4 to 1.0) |                  |
| 3 <sup>rd</sup>                                                          | 721 (18.2)  | 80 (18.5)  | 0.9 (0.7 to 1.4) | 0.83 (0.5 to 1.3) |                  |
| 4 <sup>th</sup> or more                                                  | 1494 (37.7) | 183 (42.2) | 1.1 (0.8 to 1.5) | 0.91 (0.6 to 1.5) |                  |
| Birth size (missing, n = 195)                                            |             |            |                  |                   | 0.600            |
| Large                                                                    | 1429 (37.3) | 150 (35.7) | 0.9 (0.7 to 1.3) | 0.8 (0.5 to 1.3)  |                  |
| Average                                                                  | 1617 (42.2) | 182 (43.2) | 1.0 (0.7 to 1.4) | 0.9 (0.6 to 1.3)  |                  |

|                                                                                                                          |             |            |                  |                  |       |
|--------------------------------------------------------------------------------------------------------------------------|-------------|------------|------------------|------------------|-------|
| Small                                                                                                                    | 784 (20.5)  | 89 (21.1)  | Ref.             | Ref.             |       |
| Birth weight (g) (missing, n = 2145)                                                                                     |             |            |                  |                  | 0.293 |
| ≤ 2500                                                                                                                   | 347 (9.3)   | 43 (10.5)  | Ref.             | Ref.             |       |
| ≥ 2500                                                                                                                   | 1660 (44.5) | 204 (49.6) | 1.0 (0.7, 1.5)   | 1.1 (0.7, 1.8)   |       |
| Skin-to-skin contact (missing, n = 85)                                                                                   |             |            |                  |                  | 0.772 |
| No                                                                                                                       | 2104 (53.8) | 228 (53.4) | 1.0 (0.7, 1.3)   | 0.9 (0.7, 1.3)   |       |
| Yes                                                                                                                      | 1805 (46.2) | 199 (46.6) | Ref.             | Ref.             |       |
| Initiation of breastfeeding (missing, n = 968)                                                                           |             |            |                  |                  | 0.466 |
| Early (< 1 hr.)                                                                                                          | 2341 (75.3) | 230 (71.0) | Ref.             | Ref.             |       |
| Delayed (> 1 hr.)                                                                                                        | 767 (24.7)  | 94 (29.0)  | 1.3 (0.9 to 1.8) | 0.9 (0.6 to 1.3) |       |
| *The significance level is set at 0.05.<br>COR = crude odds ratio; AOR = adjusted odds ratio; Ref. = Reference category. |             |            |                  |                  |       |



241 We found a statistically significant association between education level and prelacteal  
242 feeding. Women with low educational levels were more likely to practice prelacteal feeding  
243 compared to those who were more educated. This finding is consistent with previous studies  
244 in sub-Saharan Africa [44] and Indonesia [45] that reported low maternal education as a  
245 major determinant of some suboptimal breastfeeding practices. Studies have shown that  
246 women who provide prelacteal feeds often come from disadvantaged, poor, and less educated  
247 backgrounds [45,46]. Targeted educational and literacy support programs for women with no  
248 formal education remain the fundamental prerequisite for imparting breastfeeding and infant  
249 feeding information, fostering women's self-confidence, and enhancing the ability to utilize  
250 such information effectively [47,48]. This suggests that while formal education is necessary  
251 for all women, short-term basic nutrition education and literacy programs will significantly  
252 impact women. Therefore, stakeholders and public health institutions are obligated to ensure  
253 the provision of affordable, accessible, and family-focused nutrition, and health education  
254 programs for these populations.

255  
256 Our study found significant variations in prelacteal feeding rates across four major  
257 administrative regions of PNG, ranging from 20.6% in the Momase region to 31.2% in the  
258 Highlands region. This study further found that women from the Islands region were twice as  
259 likely to practice prelacteal feeding compared to those from the Southern region. This could  
260 have been influenced by geographic variations (ie, many scattered small islands and atolls),  
261 remoteness and lack of health service delivery, and limited access to health information for  
262 women. Another possible reason could be the inequitable distribution and allocation of health  
263 infrastructure and healthcare services. Access to health services and information is more  
264 accessible in some parts of the country, such as the Southern region, surrounding the more  
265 centrally located capital, Port Moresby, compared to those in the more distant and peripheral  
266 Islands region, which could have contributed to optimal infant feeding practices [36]. The  
267 differences in the ethnic composition of different regions and their respective sociocultural

268 norms impacting prelacteal feeding may further offer an alternative explanation [49]. Efforts  
269 to improve breastfeeding outcomes should be conceived to consider novel and context-  
270 specific strategies for women in remote and isolated settings.

271  
272 Regarding the mode of birth, women who delivered by cesarean section were four times more  
273 likely to practice prelacteal feeding compared to those who delivered vaginally. These  
274 findings align with previous studies conducted elsewhere [16,20,21,43,49], indicating that  
275 cesarean sections have been recognised as a risk factor for prelacteal feeding. There are  
276 numerous reasons suggesting that maternal recovery from pain, immobilisation, and fatigue  
277 following a cesarean section may make mothers struggle with breastfeeding. Maternal  
278 recovery from pain, immobilisation, and fatigue post-caesarean section are some of the  
279 reasons that may cause difficulties in breastfeeding [21,43]. Another possible explanation is  
280 that the post-anaesthesia effect may hinder early breastfeeding initiation, causing mothers to  
281 introduce prelacteal feeds instead of breast milk [20,49]. This study suggests that healthcare  
282 professionals and birthing facilities may be lacking in the necessary breastfeeding support  
283 strategies for caesarean mothers. More education and support are also required for infant  
284 feeding and the potential challenges women may encounter following caesarean births.

285  
286 Existing studies show significant relationships between home or village birth and prelacteal  
287 feeding [21,22,50]. We found that women who gave birth at home or in the village were three  
288 times as likely to practice prelacteal feeding compared to those who gave birth in a health  
289 facility. Women who give birth at home or in villages may not receive skilled birth attendant  
290 supervision, leading to poor newborn and postnatal guidance and care. Additionally,  
291 traditional birth attendants may have influenced women to introduce prelacteal feeds instead  
292 of initiating early breastfeeding [22,25]. Increasing awareness about health facility births,  
293 particularly among disadvantaged and rural women, is necessary to optimise exclusive  
294 breastfeeding.

## 295 **Conclusion**

296 Our study revealed that prelacteal feeding is practised among women in PNG, implying that  
297 exclusive breastfeeding behaviours are suboptimal. Women who were less educated, had a  
298 cesarean section, had home or village births, and lived in the Islands region were more likely  
299 to provide prelacteal feeds. Women and, ideally, families more generally, must have access to  
300 effective health information and educational resources that will increase their understanding  
301 of infant and young child feeding. This study calls for the strengthening of healthcare  
302 providers' capacity to encourage more health facility births and improve mothers' and  
303 household awareness of exclusive breastfeeding while addressing misconceptions and other  
304 barriers to breastfeeding to reduce prelacteal feeding. Furthermore, breastfeeding counselling  
305 and peer support for exclusive breastfeeding at antenatal clinics and outreach healthcare  
306 services should be included as an integral component of breastfeeding promotion programs in  
307 PNG and other similar settings.

308

## 309 **Acknowledgements**

310 We are thankful to the ICF International and DHS Program for permitting us to use the 2016–  
311 2018 PNGDHS dataset to conduct this study.

312

## 313 **References**

- 314 [dataset] 1 Binns C, Lee M, Low WY. The Long-Term Public Health Benefits of  
315 Breastfeeding. *Asia Pac J Public Health*. 2016;28:7–14.
- 316 [dataset] 2 Victora CG, Bahl R, Barros AJD, *et al*. Breastfeeding in the 21st century:  
317 epidemiology, mechanisms, and lifelong effect. *The Lancet*. 2016;387:475–90.
- 318 [dataset] 3 Rito AI, Buoncristiano M, Spinelli A, *et al*. Association between  
319 Characteristics at Birth, Breastfeeding and Obesity in 22 Countries: The WHO European  
320 Childhood Obesity Surveillance Initiative – COSI 2015/2017. *Obesity Facts*.  
321 2019;12:226–43.
- 322 [dataset] 4 Rollins NC, Bhandari N, Hajeebhoy N, *et al*. Why invest, and what it will take  
323 to improve breastfeeding practices? *The Lancet*. 2016;387:491–504. doi: 10.1016/S0140-  
324 6736(15)01044-2

- 325 [dataset] 5 Wang L, Collins C, Ratliff M, *et al.* Breastfeeding Reduces Childhood Obesity  
326 Risks. *Childhood Obesity*. 2017;13:197–204.
- 327 [dataset] 6 World Health Organization, UNICEF. Capture the moment - Early initiation  
328 of breastfeeding: the best start for every newborn. Geneva, Switzerland 2018.  
329 [https://www.unicef.org/publications/files/UNICEF\\_WHO\\_Capture\\_the\\_moment\\_EIBF\\_](https://www.unicef.org/publications/files/UNICEF_WHO_Capture_the_moment_EIBF_2018.pdf)  
330 [2018.pdf](https://www.unicef.org/publications/files/UNICEF_WHO_Capture_the_moment_EIBF_2018.pdf)
- 331 [dataset] 7 Zong X, Wu H, Zhao M, *et al.* Global prevalence of WHO infant feeding  
332 practices in 57 LMICs in 2010–2018 and time trends since 2000 for 44 LMICs.  
333 *eClinicalMedicine*. 2021;37. doi: 10.1016/j.eclinm.2021.100971
- 334 [dataset] 8 Jones AD, Ickes SB, Smith LE, *et al.* World Health Organization infant and  
335 young child feeding indicators and their associations with child growth: a synthesis of  
336 recent findings. *The FASEB Journal*. 2013;27:618.12-618.12.
- 337 [dataset] 9 Raihana S, Alam A, Chad N, *et al.* Delayed Initiation of Breastfeeding and  
338 Role of Mode and Place of Childbirth: Evidence from Health Surveys in 58 Low- and  
339 Middle- Income Countries (2012–2017). *International Journal of Environmental*  
340 *Research and Public Health*. 2021;18. doi: 10.3390/ijerph18115976
- 341 [dataset] 10 Smith ER, Hurt L, Chowdhury R, *et al.* Delayed breastfeeding initiation and  
342 infant survival: A systematic review and meta-analysis. *PLOS ONE*. 2017;12:e0180722.
- 343 [dataset] 11 World Health Organization (WHO). Exclusive breastfeeding for optimal  
344 growth, development and health of infants. 2019.  
345 [https://www.who.int/elena/titles/exclusive\\_breastfeeding/en/](https://www.who.int/elena/titles/exclusive_breastfeeding/en/)
- 346 [dataset] 12 Chea N, Asefa A. Prolactal feeding and associated factors among newborns  
347 in rural Sidama, south Ethiopia: a community based cross-sectional survey. *International*  
348 *Breastfeeding Journal*. 2018;13:7.
- 349 [dataset] 13 Jimoh A, Adaji S, Adelaiye H, *et al.* Factors associated with prolactal feeding  
350 practices in a rural northern Nigerian setting. *null*. 2018;31:37–42.
- 351 [dataset] 14 Wolde TF, Ayele AD, Takele WW. Prolactal feeding and associated factors  
352 among mothers having children less than 24 months of age, in Mettu district, Southwest  
353 Ethiopia: a community based cross-sectional study. *BMC Research Notes*. 2019;12:9.
- 354 [dataset] 15 Abdulla F, Hossain MdM, Karimuzzaman Md, *et al.* Likelihood of infectious  
355 diseases due to lack of exclusive breastfeeding among infants in Bangladesh. *PLOS ONE*.  
356 2022;17:e0263890.
- 357 [dataset] 16 Gilano G, Hailegebreal S, Kashala K, *et al.* Individual and community-level  
358 factors associated with introducing prolactal feeding in Ethiopia. *Clinical Nutrition*  
359 *Open Science*. 2023;52:14–24.
- 360 [dataset] 17 Neves PA, Armenta-Paulino N, Arroyave L, *et al.* Prolactal feeding and its  
361 relationship with exclusive breastfeeding and formula consumption among infants in  
362 low- and middle-income countries. *J Glob Health*. 2022;12:04104.
- 363 [dataset] 18 Nguyen P, Binns CW, Ha AVV, *et al.* Prolactal and early formula feeding  
364 increase risk of infant hospitalisation: a prospective cohort study. *Arch Dis Child*.  
365 2020;105:122.

- 366 [dataset] 19 Belachew AB, Kahsay AB, Abebe YG. Individual and community-level  
367 factors associated with introduction of prelacteal feeding in Ethiopia. *Archives of Public*  
368 *Health*. 2016;74:6.
- 369 [dataset] 20 Molla G, Getachew F, Tadele A, *et al.* Determinants of pre-lacteal feeding  
370 practice in Ethiopia: Evidence from the 2019 Mini Demographic and Health Survey  
371 (MDHS), a community-based cross-sectional study [version 1; peer review: awaiting peer  
372 review]. *F1000Research*. 2023;12. doi: 10.12688/f1000research.124908.1
- 373 [dataset] 21 Teshale AB, Worku MG, Tessema ZT, *et al.* Prelacteal feeding practice and  
374 its associated factors among mothers having children less than 2 years of age in East  
375 Africa: a multilevel analysis of the recent demographic and health surveys. *International*  
376 *Breastfeeding Journal*. 2021;16:68.
- 377 [dataset] 22 Akello R, Kimuli D, Okoboi S, *et al.* Prelacteal feeding among infants within  
378 the first week of birth in eastern Uganda: evidence from a health facility-based cross-  
379 sectional study. *International Breastfeeding Journal*. 2021;16:77.
- 380 [dataset] 23 Asaro T, Gutema BT, Weldehawaryat HN. Colostrum avoidance practice and  
381 associated factors among mothers of infants less than six months in Chencha District:  
382 cross-sectional study. *BMC Nutrition*. 2023;9:18.
- 383 [dataset] 24 Gebremeskel SG, Gebru TT, Kassahun SS, *et al.* Magnitude of Prelacteal  
384 Feeding and Its Associated Factors among Mothers Having Children Less than One Year  
385 of Age: A Community-Based Cross-Sectional Study in Rural Eastern Zone, Tigray,  
386 Ethiopia. *Advances in Public Health*. 2020;2020:4926890.
- 387 [dataset] 25 Maviso MK, Kaforau LM, Hastie C. Influence of grandmothers on  
388 breastfeeding practices in a rural community in Papua New Guinea: A critical discourse  
389 analysis of first-time mothers' perspectives. *Women and Birth*. 2023;36:e263–9.
- 390 [dataset] 26 Ogbo FA, Nguyen H, Naz S, *et al.* The association between infant and young  
391 child feeding practices and diarrhoea in Tanzanian children. *Tropical Medicine and*  
392 *Health*. 2018;46:2.
- 393 [dataset] 27 Tariku A, Biks GA, Wassie MM, *et al.* Factors associated with prelacteal  
394 feeding in the rural population of northwest Ethiopia: a community cross-sectional study.  
395 *International Breastfeeding Journal*. 2016;11:14.
- 396 [dataset] Early breastfeeding practices: Descriptive analysis of recent Demographic and  
397 Health Surveys. *Maternal & Child Nutrition*. 2018;14:e12535.
- 398 [dataset] 29 Khanal V, Lee AH, Karkee R, *et al.* Prevalence and factors associated with  
399 prelacteal feeding in Western Nepal. *Women and Birth*. 2016;29:12–7.
- 400 [dataset] 30 Kumar R, Amir-ud-Din R, Ahmed J, *et al.* Correlates of early initiation of  
401 breast feeding and prelacteal feeding: a cross-sectional study in Sindh province of  
402 Pakistan. *BMJ Open*. 2023;13:e069902.
- 403 [dataset] 31 Sultana F, Sheba IT. Factors Associated With Pre-Lacteal Feeding Practices  
404 Among Mothers Having Children Aged 0-36 Months in Bangladesh: Evidence From  
405 Bangladesh Demographic and Health Survey 2017-18. *Global Pediatric Health*.  
406 2022;9:2333794X2210795.

- 407 [dataset] 32 National Statistical Office (NSO) [Papua New Guinea], ICF. Papua New  
408 Guinea Demographic and Health Survey 2016-18. Port Moresby, Papua New Guinea,  
409 and Rockville, Maryland, USA: NSO and ICF 2019.  
410 <https://www.dhsprogram.com/pubs/pdf/FR364/FR364.pdf>
- 411 [dataset] 33 Pham BN, Silas VD, Okely AD, *et al.* Breastfeeding Rate, Food  
412 Supplementation, Dietary Diversity Among Children Aged 6–59 Months, and Associated  
413 Factors in Papua New Guinea. *Frontiers in Nutrition*. 2021;8:18.
- 414 [dataset] 34 Kuzma J. Knowledge, attitude and practice related to infant feeding among  
415 women in rural Papua New Guinea: a descriptive, mixed method study. *International*  
416 *Breastfeeding Journal*. 2013;8:16.
- 417 [dataset] 35 Goris JM, Zomerdijk N, Temple VJ. Nutritional status and dietary diversity of  
418 Kamea in Gulf province, Papua New Guinea. *Asia Pacific Journal of Clinical Nutrition*.  
419 2017;26:665.
- 420 [dataset] 36 Seidu A-A, Ahinkorah BO, Agbaglo E, *et al.* Determinants of early initiation  
421 of breastfeeding in Papua New Guinea: a population-based study using the 2016-2018  
422 demographic and health survey data. *Archives of Public Health*. 2020;78:124.
- 423 [dataset] 37 Maviso MK, Ferguson B, Kaforau LM, *et al.* A qualitative descriptive inquiry  
424 into factors influencing early weaning and breastfeeding duration among first-time  
425 mothers in Papua New Guinea’s rural eastern highlands. *Women and Birth*. 2022;35:e68–  
426 74.
- 427 [dataset] 38 Terry B, Kebio L, Kuzma J. Knowledge, attitude and practice of mothers  
428 towards breastfeeding in rural Papua New Guinea: a mixed method study. *Papua New*  
429 *Guinea Medical Journal*. 2015;58:22.
- 430 [dataset] 39 Li R, Scanlon KS, Serdula MK. The validity and reliability of maternal recall  
431 of breastfeeding practice. *Nutrition reviews*. 2005;63:103–10.
- 432 [dataset] 40 Neville MC, Morton J. Physiology and Endocrine Changes Underlying  
433 Human Lactogenesis II. *The Journal of Nutrition*. 2001;131:3005S-3008S.
- 434 [dataset] 41 West BT. Statistical and methodological issues in the analysis of complex  
435 sample survey data: Practical guidance for trauma researchers. *Journal of Traumatic*  
436 *Stress*. 2008;21:440–7.
- 437 [dataset] 42 Argaw MD, Asfaw MM, Ayalew MB, *et al.* Factors associated with prelacteal  
438 feeding practices in Debre Berhan district, North Shoa, Central Ethiopia: a cross-  
439 sectional, community-based study. *BMC Nutrition*. 2019;5:14.
- 440 [dataset] 43 Rahmartani LD, Carson C, Quigley MA. Prevalence of prelacteal feeding and  
441 associated risk factors in Indonesia: Evidence from the 2017 Indonesia Demographic  
442 Health Survey. *PLOS ONE*. 2020;15:e0243097.
- 443 [dataset] 44 Berde AS, Ozcebe H. Risk factors for prelacteal feeding in sub-Saharan  
444 Africa: a multilevel analysis of population data from twenty-two countries. *Public Health*  
445 *Nutrition*. 2017;20:1953–62.
- 446 [dataset] The multiple factors of suboptimal early feeding practices among infants aged 0–  
447 5 months in Indonesia. *Frontiers in Nutrition*. 2023;10. doi:  
448 <https://doi.org/10.3389/fnut.2023.1080727>

- 449 [dataset] 46 Zakarija-Grković I, Šegvić O, Vučković Vukušić A, *et al.* Predictors of  
450 suboptimal breastfeeding: an opportunity for public health interventions. *European*  
451 *Journal of Public Health.* 2016;26:282–9.
- 452 [dataset] 47 Abdulahi M, Fretheim A, Argaw A, *et al.* Breastfeeding Education and  
453 Support to Improve Early Initiation and Exclusive Breastfeeding Practices and Infant  
454 Growth: A Cluster Randomized Controlled Trial from a Rural Ethiopian Setting.  
455 *Nutrients.* 2021;13:1204.
- 456 [dataset] 48 Valero-Chillerón MJ, Mena-Tudela D, Cervera-Gasch Á, *et al.* Influence of  
457 Health Literacy on Maintenance of Exclusive Breastfeeding at 6 Months Postpartum: A  
458 Multicentre Study. *Int J Environ Res Public Health.* 2022;19:5411.
- 459 [dataset] 49 Merga BT, Balis B, Fekadu G, *et al.* Determinants of pre-lacteal feeding  
460 practices among mothers having children aged less than 36 months in Ethiopia: Evidence  
461 from 2016 Ethiopian demographic and health survey. *SAGE Open Medicine.* 2021;9. doi:  
462 10.1177/20503121211019235
- 463 [dataset] 50 Legesse M, Demena M, Mesfin F, *et al.* Prelacteal feeding practices and  
464 associated factors among mothers of children aged less than 24 months in Raya Kobo  
465 district, North Eastern Ethiopia: a cross-sectional study. *International Breastfeeding*  
466 *Journal.* 2014;9:189.

467

## 468 **Supplementary materials**

469 STROBE Checklist

470

## 471 **Footnotes**

472 **Contributors:** MM conceptualized and designed the study. MM and EN conducted statistical  
473 analyses. MM drafted the original manuscript. MM, EN and GG contributed to the writing  
474 and editing of the manuscript. MM and GG reviewed and edited the manuscript. All the  
475 authors reviewed and approved the final version of the manuscript. MM is the guarantor and  
476 accepts full responsibility for the work.

477

478 **Funding:** The authors have not declared a specific grant for this research from any funding  
479 agency in the public, commercial, or not-for-profit sectors.

480

481 **Competing interests:** None declared.

482

483 **Patient consent for publication:** Not required.

484

485 **Ethics approval:** The 2016–2018 PNGDHS protocol was reviewed and approved by the  
486 Institutional Review Board (IRB) of ICF and IRB of host country. Informed consent was  
487 obtained from all participants before the interviews were conducted. For this study, a formal  
488 request to use the raw data was obtained from the DHS program. Permission was granted by  
489 the DHS program to access the data, which was anonymized for analysis.

490

491 **Provenance and peer review:** Not commissioned; externally peer reviewed.

492

493 **Data availability statement:** The 2016–2018 PNGDHS data are publicly available in a  
494 public, open-access repository. Data can be obtained upon a registration-access request from  
495 the DHS Program website at <https://dhsprogram.com/data/available-datasets.cfm>.
